# Supplementary material for: Circulating fatty acids and risk of severe non-alcoholic fatty liver disease in the UK biobank: a prospective cohort of 116 223 individuals
Source: Royal Society of Chemistry journal article supplement (doi:10.1039/d4fo01182a), 2024-01-01
Supplement: d4fo01182a1.pdf [file d4fo01182a1.pdf]

## Electronic Supplementary Information

# Circulating fatty acids and risk of severe non-alcoholic fatty liver disease: a prospective cohort of 116,223 individuals

Pan Zhuang, Yang Ao, Xiaohui Liu, Hao Ye, Haoyu Li, Xuzhi Wan, Yu Zhang, Jingjing Jiao\*

## Table of Contents

**Supplemental Figure 1.** Flow chart of study participants for analysis.

**Supplemental Figure 2.** Dose-response relationships between specific n-3 PUFAs/n-6 PUFAs and NAFLD risk.

**Supplemental Table 1.** Single-nucleotide polymorphisms associated with circulating individual FAs

**Supplemental Table 2.** Codes used in the UK Biobank to identify NAFLD, other liver diseases and alcohol/drug use disorder

**Supplemental Table 3.** Spearman correlations between plasma fatty acids (% of total fatty acids)

**Supplemental Table 4.** Association between plasma PUFAs and the risk of NAFLD

**Supplemental Table 5.** Mediating effects of biomarkers on the association of plasma FAs with risk of NAFLD

**Supplemental Table 6.** Interactions of plasma FAs with number of FA-associated alleles for NAFLD risk

**Supplemental Table 7.** Interactions between plasma FAs and individual FA-associated SNPs for NAFLD risk

**Supplemental Table 8.** The subgroup analysis of plasma FAs and NAFLD risk

**Supplemental Table 9.** The sensitivity analysis of plasma FAs and NAFLD risk

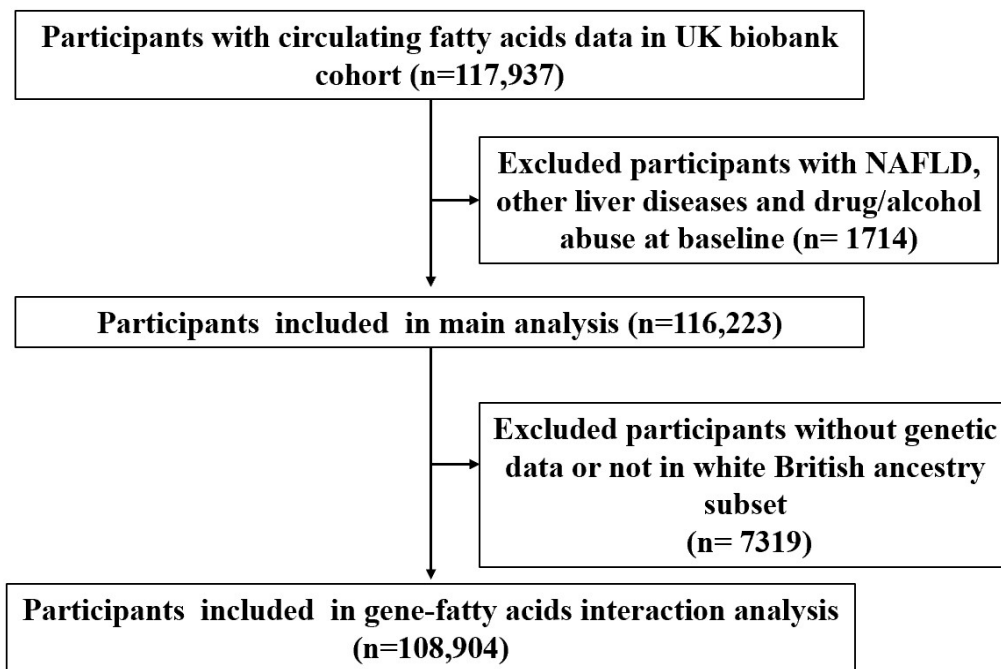

**Supplemental Figure 1.** Flow chart of study participants for analysis. *NAFLD* non-alcoholic fatty liver disease.

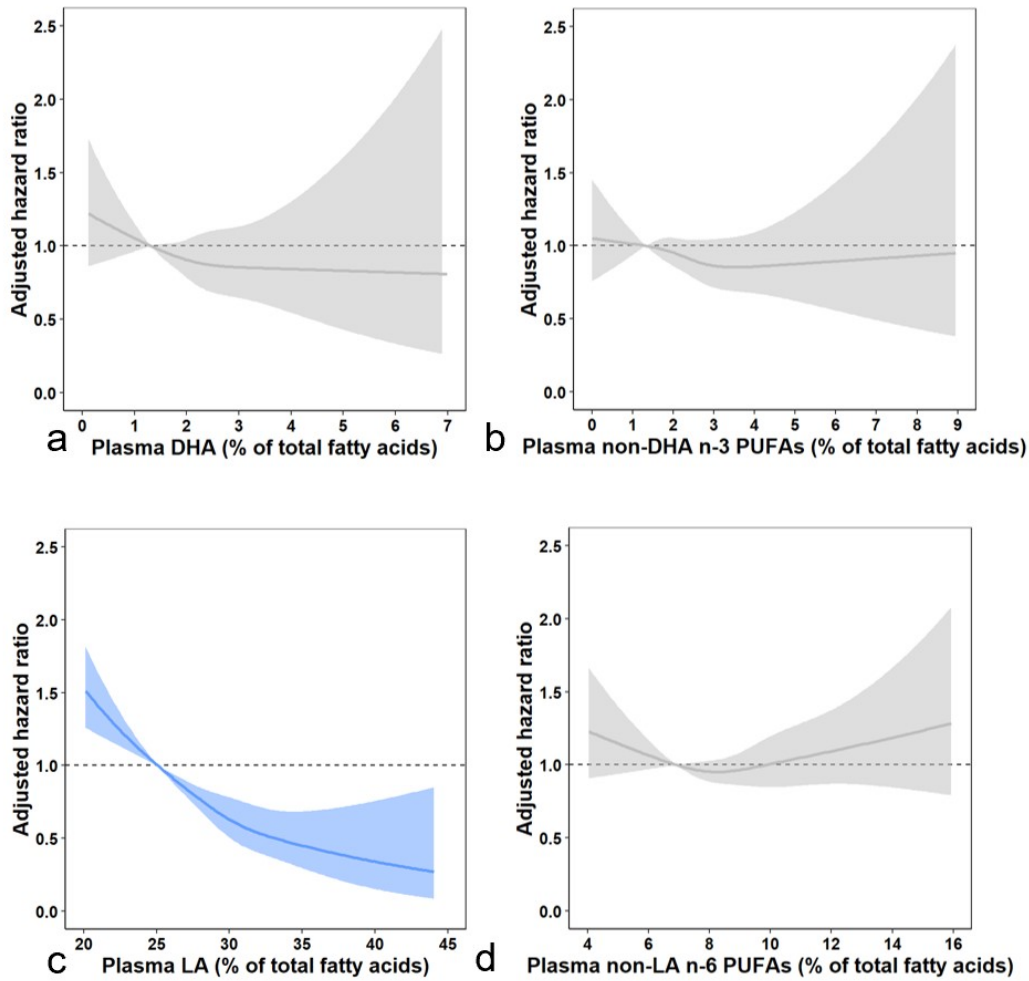

**Supplemental Figure 2.** Dose-response relationships between specific n-3 PUFAs/n-6 PUFAs and NAFLD risk. HRs for NAFLD associated with plasma DHA (a), non-DHA n-3 PUFA (b), LA (c), and non-LA n-6 PUFA (d) were estimated by restricted cubic-spline regression adjusted for age, sex, race, BMI, education, household income, smoking status, alcohol consumption, physical activity, history of hypertension, CVD, high cholesterol and cancer, diabetes, aspirin use, vitamin use, mineral use, and remaining circulating fatty acids. *LA* linoleic acid, *DHA* docosahexaenoic acid, *NAFLD* non-alcoholic fatty liver disease.

**Supplemental Table 1.** Single-nucleotide polymorphisms associated with circulating individual FAs

| Type of FA | FA   | SD         | SNP        | Chr   | Nearby gene    | EA | NEA      | % Variance explained | Summary statistics for SNP-FA association |           |           |
|------------|------|------------|------------|-------|----------------|----|----------|----------------------|-------------------------------------------|-----------|-----------|
|            |      |            |            |       |                |    |          |                      | Beta <sup>a</sup>                         | SE        | P         |
| n-3 PUFA   | ALA  | 0.05       | rs174547   | 11    | FADS1          | C  | T        | 1                    | 0.02                                      | 0.001     | 3.50E-64  |
|            | EPA  | 0.3        | rs3798713  | 6     | ELOVL2         | C  | G        | 0.4                  | 0.04                                      | 0.005     | 1.90E-12  |
|            |      |            | rs174538   | 11    | FADS1/C11orf10 | G  | A        | 1.7                  | 0.08                                      | 0.005     | 5.40E-58  |
|            |      |            | rs780094   | 2     | GCKR           | T  | C        | 0.5                  | 0.02                                      | 0.003     | 9.00E-09  |
|            | DPA  | 0.17       | rs3734398  | 6     | ELOVL2         | C  | T        | 2.7                  | 0.04                                      | 0.003     | 9.70E-43  |
| n-6 PUFA   | DHA  | 0.89       | rs174547   | 11    | FADS1          | T  | C        | 8.4                  | 0.08                                      | 0.003     | 3.80E-154 |
|            |      |            | rs2236212  | 6     | ELOVL2         | G  | C        | 0.7                  | 0.11                                      | 0.014     | 1.30E-15  |
|            | LA   | 2.69       | rs10740118 | 10    | JMJD1C         | G  | C        | 0.2-0.7              | 0.25                                      | 0.050     | 8.10E-09  |
|            |      |            | rs174547   | 11    | FADS1          | C  | T        | 7.6-18.1             | 1.47                                      | 0.050     | 5.00E-274 |
|            |      |            | rs16966952 | 16    | NTAN1          | G  | A        | 0.5-2.5              | 0.35                                      | 0.040     | 1.20E-15  |
| AA         | 1.96 | rs174547   | 11         | FADS1 | T              | C  | 3.7-37.6 | 1.69                 | 0.020                                     | 3.30E-971 |           |
|            |      | rs16966952 | 16         | NTAN1 | G              | A  | 0.1-0.6  | 0.20                 | 0.030                                     | 2.40E-10  |           |
|            |      | rs780093   | 2          | GCKR  | T              | C  | 0.2-0.9  | 0.02                 | 0.003                                     | 9.80E-10  |           |
| n-7 MUFA   | POA  | 0.18       | rs6722456  | 2     | RN7SKP93       | G  | A        | 0.01-0.6             | 0.05                                      | 0.009     | 4.10E-08  |
|            |      |            | rs603424   | 10    | SCD/PKD2L1     | G  | A        | 0.3-1.6              | 0.03                                      | 0.004     | 5.70E-15  |
|            |      |            | rs11190604 | 10    | HIF1AN         | G  | A        | 0.02-0.7             | 0.02                                      | 0.004     | 5.70E-09  |
| n-9 MUFA   | OA   | 1.17       | rs102275   | 11    | FADS1/2        | C  | T        | 0.15-1.0             | 0.02                                      | 0.003     | 6.60E-13  |
|            |      |            | rs102275   | 11    | FADS1/2        | C  | T        | 0.3-2.1              | 0.23                                      | 0.020     | 2.20E-32  |
| SFA        | PA   | 1.64       | rs2391388  | 1     | ALG14          | C  | A        | 0.2-1.0              | 0.18                                      | 0.030     | 2.70E-11  |
|            |      |            | rs6675668  | 1     | ALG14          | G  | T        | 0.4-1.4              | 0.17                                      | 0.020     | 2.20E-18  |
|            | SA   | 1.19       | rs11119805 | 1     | LPGAT1         | T  | A        | 0.01-0.7             | 0.17                                      | 0.030     | 2.80E-09  |
|            |      |            | rs102275   | 11    | FADS1/2        | T  | C        | 0.3-1.2              | 0.18                                      | 0.020     | 1.30E-20  |

*Abbreviations:* *AA* arachidonic acid, *ALA*  $\alpha$ -linolenic acid, *Chr* chromosome, *DHA* docosahexaenoic acid, *DPA* docosapentaenoic acid, *EA* effect allele, *EAF* effect allele frequency, *EPA* eicosapentaenoic acid, *FA* fatty acid, *LA* linoleic acid, *MUFA* monounsaturated fatty acid, *OA* oleic acid, *PA* palmitic acid, *POA* palmitoleic acid, *PUFA* polyunsaturated fatty acid, *SA* stearic acid, *SD* standard deviation, *SFA* saturated fatty acid, *SNP* single-nucleotide polymorphisms.

<sup>a</sup> The beta coefficients represent the change in the percentage of total fatty acids for each additional effect allele (Yuan S, Larsson SC. Plasma phospholipid fatty acids and risk of atrial fibrillation: A mendelian randomization study. *Nutrients*. 2019;11(7):1651. doi: 10.3390/nu11071651).

**Supplemental Table 2.** Codes used in the UK Biobank to identify NAFLD, other liver diseases and alcohol/drug use disorder

| <input type="checkbox"/>  | <b>ICD-10</b>                                                                                                                      |
|---------------------------|------------------------------------------------------------------------------------------------------------------------------------|
| NAFLD                     | K760, K758                                                                                                                         |
| Other liver disease       | B16, B17, B18, B19, E83.1, E83.0B, E88.0A, E88.0B, I82.0, K70, K73.9, K73.2, K74.3, K74.4, K74.5, K75.4, K76.5, K83.0A, K83.0F     |
| Alcohol/drug use disorder | E24.4, F10, F11-F14, F16, F18, F19, G31.2, G62.1, G72.1, I42.6, K29.2, K85.2, K86.0, T51.0, T51.9, X65, Y57.3, Z50.2, Z71.4, Z72.1 |

*Abbreviations: NAFLD non-alcoholic fatty liver disease.*

**Supplemental Table 3.** Spearman correlations between plasma fatty acids (% of total fatty acids)

|                   | SFAs | MUFAs | PUFAs | n-6 PUFAs | LA    | non-LA n-6 PUFAs | n-3 PUFAs | DHA   | non-DHA n-3 PUFAs |
|-------------------|------|-------|-------|-----------|-------|------------------|-----------|-------|-------------------|
| SFAs              | 1.00 | 0.26  | -0.69 | -0.65     | -0.64 | -0.09            | -0.13     | -0.27 | -0.01             |
| MUFAs             |      | 1.00  | -0.86 | -0.74     | -0.47 | -0.56            | -0.29     | -0.65 | -0.03             |
| PUFAs             |      |       | 1.00  | 0.88      | 0.67  | 0.45             | 0.28      | 0.61  | 0.03              |
| n-6 PUFAs         |      |       |       | 1.00      | 0.83  | 0.37             | -0.14     | 0.26  | -0.38             |
| LA                |      |       |       |           | 1.00  | -0.14            | -0.25     | 0.06  | -0.41             |
| non-LA n-6 PUFAs  |      |       |       |           |       | 1.00             | 0.19      | 0.43  | 0.01              |
| n-3 PUFAs         |      |       |       |           |       |                  | 1.00      | 0.83  | 0.93              |
| DHA               |      |       |       |           |       |                  |           | 1.00  | 0.60              |
| non-DHA n-3 PUFAs |      |       |       |           |       |                  |           |       | 1.00              |

DHA=docosahexaenoic acid, LA=linoleic acid, MUFA=monounsaturated fatty acid, PUFA=polyunsaturated fatty acid, SFA=saturated fatty acid.  $P<0.001$  for all correlations.

**Supplemental Table 4.** Association between plasma PUFAs and the risk of NAFLD

| □                       | Quartiles of plasma FAs (% of total FAs) |                  |                  |                  | <i>P</i> trend |
|-------------------------|------------------------------------------|------------------|------------------|------------------|----------------|
|                         | Q1                                       | Q2               | Q3               | Q4               |                |
| DHA                     |                                          |                  |                  |                  |                |
| Range (% of plasma FAs) | <1.6                                     | 1.6-1.9          | 1.9-2.4          | >2.4             |                |
| Median                  | 1.3                                      | 1.8              | 2.1              | 2.7              |                |
| Cases/person-years      | 533/354,314                              | 380/356,591      | 270/357,813      | 211/358,547      |                |
| Model 1                 | 1.00 (ref.)                              | 0.70 (0.61-0.79) | 0.48 (0.42-0.56) | 0.37 (0.32-0.44) | <0.001         |
| Model 2                 | 1.00 (ref.)                              | 0.82 (0.72-0.94) | 0.65 (0.56-0.76) | 0.58 (0.49-0.69) | <0.001         |
| Model 3                 | 1.00 (ref.)                              | 0.98 (0.84-1.14) | 0.87 (0.72-1.05) | 0.92 (0.71-1.19) | 0.278          |
| Non-DHA n-3 PUFAs       |                                          |                  |                  |                  |                |
| Range (% of plasma FAs) | <1.7                                     | 1.7-2.3          | 2.3-3.0          | >3.0             |                |
| Median                  | 1.3                                      | 2.0              | 2.6              | 3.5              |                |
| Cases/person-years      | 316/357,133                              | 366/356,823      | 370/356,745      | 342/356,564      |                |
| Model 1                 | 1.00 (ref.)                              | 1.14 (0.98-1.33) | 1.14 (0.98-1.33) | 1.05 (0.90-1.23) | 0.604          |
| Model 2                 | 1.00 (ref.)                              | 1.03 (0.88-1.20) | 1.00 (0.86-1.16) | 0.97 (0.82-1.13) | 0.592          |
| Model 3                 | 1.00 (ref.)                              | 0.96 (0.82-1.12) | 0.91 (0.76-1.08) | 0.91 (0.73-1.14) | 0.339          |
| LA                      |                                          |                  |                  |                  |                |
| Range (% of plasma FAs) | <26.9                                    | 26.9-29.2        | 29.2-31.4        | >31.4            |                |
| Median                  | 25.1                                     | 28.2             | 30.3             | 32.8             |                |
| Cases/person-years      | 655/350,562                              | 353/355,255      | 228/359,130      | 158/362,318      |                |
| Model 1                 | 1.00 (ref.)                              | 0.52 (0.46-0.60) | 0.33 (0.28-0.38) | 0.22 (0.19-0.27) | <0.001         |
| Model 2                 | 1.00 (ref.)                              | 0.72 (0.63-0.82) | 0.55 (0.47-0.65) | 0.44 (0.37-0.54) | <0.001         |
| Model 3                 | 1.00 (ref.)                              | 0.87 (0.74-1.02) | 0.77 (0.61-0.96) | 0.73 (0.54-0.99) | 0.021          |
| Non-LA n-6 PUFAs        |                                          |                  |                  |                  |                |



| Range (% of plasma FAs) | <7.7        | 7.7-8.9          | 8.9-10.2         | >10.2            |        |
|-------------------------|-------------|------------------|------------------|------------------|--------|
| Median                  | 6.9         | 8.3              | 9.5              | 11.3             |        |
| Cases/person-years      | 392/358,169 | 350/358,179      | 315/356,826      | 337/354,092      |        |
| Model 1                 | 1.00 (ref.) | 0.90 (0.78-1.04) | 0.82 (0.70-0.95) | 0.88 (0.76-1.02) | 0.043  |
| Model 2                 | 1.00 (ref.) | 0.92 (0.80-1.07) | 0.82 (0.70-0.95) | 0.75 (0.64-0.87) | <0.001 |
| Model 3                 | 1.00 (ref.) | 1.01 (0.87-1.18) | 1.00 (0.84-1.19) | 1.08 (0.87-1.33) | 0.613  |

*Abbreviations: FAs fatty acids, DHA docosahexaenoic acid, LA linoleic acid, NAFLD non-alcoholic fatty liver disease.*

Model 1: adjusted for age, sex

Model 2: model 1+race (White, non-White, or other ethnic group), assessment centers (22 categories), BMI (in kg/m<sup>2</sup>; < 25, 25 to 30, ≥30, or missing), education (college or university degree, vocational qualifications, optional national exams at ages 17–18 years, national exams at age 16 years, others, or missing), household income (<£18,000, £18,000-£30,999, £31,000-£51,999, £52,000-£100,000, >£100,000, or missing), smoking status (never, former, current, or missing), alcohol consumption (never, special occasions only, 1–3 times/month, 1 or 2 times/week, 3 or 4 times/week, or daily/almost daily), physical activity (in MET-h/week; quartiles), history of hypertension (yes, no), CVD (yes, no), high cholesterol (yes, no) and cancer (yes, no), diabetes (yes, no), aspirin use (yes, no), vitamin use (yes, no), mineral use (yes, no),

Model 3: model 2+ remain circulating fatty acids (quartiles)

**Supplemental Table 5.** Mediating effects of biomarkers on the association of plasma FAs with risk of NAFLD

| Mediators          | N       | Total effect     | Direct effect    | Proportion mediated | P value |
|--------------------|---------|------------------|------------------|---------------------|---------|
| SFAs and NAFLD     |         |                  |                  |                     |         |
| CRP                | 110,769 | 1.22(1.15-1.32)  | 1.24(1.16-1.33)  | NA                  | NA      |
| TG                 | 110,881 | 1.23(1.15-1.31)  | 1.21(1.12-1.30)  | 7.5% (1.3%-32.8%)   | 0.117   |
| TC                 | 110,968 | 1.23(1.15-1.32)  | 1.25(1.17-1.34)  | NA                  | NA      |
| HDL                | 101,692 | 1.23(1.14-1.32)  | 1.23(1.15-1.32)  | NA                  | NA      |
| Blood glucose      | 101,615 | 1.23(1.15-1.32)  | 1.23(1.14-1.32)  | 1.1% (0.3%-4.3%)    | 0.075   |
| LDL                | 110,803 | 1.23(1.15-1.32)  | 1.24(1.16-1.33)  | NA                  | NA      |
| HbA1c              | 110,835 | 1.22(1.14-1.31)  | 1.22(1.14-1.30)  | NA                  | NA      |
| MUFAs and NAFLD    |         |                  |                  |                     |         |
| CRP                | 110,769 | 1.21 (1.10-1.34) | 1.19 (1.07-1.31) | 10.1% (5.1%-18.9%)  | <0.001  |
| TG                 | 110,881 | 1.21 (1.10-1.34) | 1.21 (1.08-1.37) | NA                  | NA      |
| TC                 | 110,968 | 1.21 (1.10-1.33) | 1.21 (1.10-1.34) | NA                  | NA      |
| HDL                | 101,692 | 1.16(1.05-1.29)  | 1.11(1.00-1.23)  | 32.6% (11.1%-65.2%) | 0.001   |
| Blood glucose      | 101,615 | 1.17(1.05-1.29)  | 1.16(1.05-1.29)  | 4.3% (1.0%-16.4%)   | 0.059   |
| LDL                | 110,803 | 1.21 (1.10-1.34) | 1.21 (1.09-1.33) | 1.6% (0.6%-4.0%)    | 0.013   |
| HbA1c              | 110,835 | 1.22(1.10-1.35)  | 1.22(1.10-1.34)  | 1.4% (0.1%-13.0%)   | 0.192   |
| N3 PUFAs and NAFLD |         |                  |                  |                     |         |
| CRP                | 110,769 | 0.91(0.83-1.00)  | 0.93(0.85-1.02)  | 24.7% (8.3%-54.1%)  | <0.001  |
| TG                 | 110,881 | 0.91(0.83-1.00)  | 0.90(0.83-0.99)  | NA                  | NA      |
| TC                 | 110,968 | 0.91(0.83-1.00)  | 0.92(0.84-1.01)  | 11.4% (3.5%-31.5%)  | 0.002   |
| HDL                | 101,692 | 0.91(0.83-1.00)  | 0.92(0.84-1.01)  | 9.6% (2.9%-27.6%)   | 0.001   |
| Blood glucose      | 101,615 | 0.91(0.83-1.00)  | 0.91(0.83-1.00)  | NA                  | NA      |
| LDL                | 110,803 | 0.91(0.83-1.00)  | 0.92(0.84-1.00)  | 8.0% (2.5%-23.0%)   | 0.002   |

|                    |         |                 |                 |                    |        |
|--------------------|---------|-----------------|-----------------|--------------------|--------|
| HbA1c              | 110,835 | 0.90(0.83-0.99) | 0.91(0.83-0.99) | 1.5% (0.2%-10.9%)  | 0.145  |
| N6 PUFAs and NAFLD |         |                 |                 |                    |        |
| CRP                | 110,769 | 0.78(0.70-0.86) | 0.78(0.70-0.87) | NA                 | NA     |
| TG                 | 110,881 | 0.78(0.70-0.87) | 0.78(0.68-0.89) | NA                 | NA     |
| TC                 | 110,968 | 0.78(0.70-0.87) | 0.77(0.70-0.86) | NA                 | NA     |
| HDL                | 101,692 | 0.80(0.72-0.89) | 0.82(0.73-0.92) | 12.2% (5.1%-26.6%) | 0.002  |
| Blood glucose      | 101,615 | 0.80(0.71-0.89) | 0.80(0.72-0.89) | 3.0% (0.7%-11.2%)  | 0.063  |
| LDL                | 110,803 | 0.78(0.70-0.87) | 0.78(0.70-0.86) | NA                 | NA     |
| HbA1c              | 110,835 | 0.77(0.70-0.86) | 0.77(0.70-0.86) | 1.0% (0.1%-10.9%)  | 0.207  |
| LA and NAFLD       |         |                 |                 |                    |        |
| CRP                | 110,769 | 0.74(0.67-0.83) | 0.76(0.68-0.85) | 8.0% (4.7%-13.3%)  | <0.001 |
| TG                 | 110,881 | 0.75(0.67-0.83) | 0.77(0.69-0.87) | 12.3% (3.0%-38.9%) | 0.062  |
| TC                 | 110,968 | 0.74(0.67-0.83) | 0.76(0.68-0.85) | 6.1% (1.5%-21.4%)  | 0.065  |
| HDL                | 101,692 | 0.76(0.68-0.85) | 0.78(0.69-0.88) | 10.8% (4.0%-25.8%) | 0.010  |
| Blood glucose      | 101,615 | 0.75(0.67-0.84) | 0.76(0.67-0.85) | 1.6% (0.4%-5.7%)   | 0.058  |
| LDL                | 110,803 | 0.75(0.67-0.83) | 0.76(0.68-0.85) | 6.2% (1.4%-23.8%)  | 0.084  |
| HbA1c              | 110,835 | 0.74(0.66-0.82) | 0.74(0.66-0.82) | NA                 | NA     |

*Abbreviations: FAs* fatty acids, *CRP* C-reactive protein, *HbA1c* Hemoglobin A1c, *HDL-C* high-density lipoprotein cholesterol, *LDL-C* low-density lipoprotein cholesterol, *TG* triglyceride, *TC* total cholesterol, *MUFA* monounsaturated fatty acid, *PUFA* polyunsaturated fatty acid, *SFA* saturated fatty acid.

NA: proportion mediated was not calculated when the point estimate of the direct effect was in a direction opposite to that of the indirect effect.

**Supplemental Table 6.** Interactions of plasma FAs with number of FA-associated alleles for NAFLD risk

| □                                 | □               | Number of alleles |       |       | □ FA   |       |       | □ Number of alleles×FA |       |       |
|-----------------------------------|-----------------|-------------------|-------|-------|--------|-------|-------|------------------------|-------|-------|
|                                   |                 | □ β               | □ SE  | □ P   | □ β    | □ SE  | □ P   | □ β                    | □ SE  | □ P   |
| SFA-associated alleles            | SFA             | 0.044             | 0.035 | 0.211 | 0.487  | 0.141 | 0.001 | -0.060                 | 0.028 | 0.032 |
| MUFA-associated alleles           | MUFA            | 0.002             | 0.019 | 0.906 | 0.140  | 0.111 | 0.208 | 0.007                  | 0.015 | 0.654 |
| EPA-associated alleles            | n-3 PUFA        | 0.036             | 0.031 | 0.244 | -0.090 | 0.085 | 0.290 | -0.007                 | 0.033 | 0.843 |
|                                   | DHA             | 0.036             | 0.033 | 0.277 | -0.112 | 0.089 | 0.211 | 0.015                  | 0.032 | 0.646 |
|                                   | non-DHA PUFA    | 0.032             | 0.030 | 0.292 | -0.046 | 0.087 | 0.598 | -0.021                 | 0.032 | 0.517 |
| DPA-associated alleles            | n-3 PUFA        | 0.041             | 0.024 | 0.097 | -0.114 | 0.090 | 0.205 | 0.002                  | 0.027 | 0.935 |
|                                   | DHA             | 0.040             | 0.026 | 0.128 | -0.113 | 0.094 | 0.232 | 0.011                  | 0.026 | 0.661 |
|                                   | non-DHA PUFA    | 0.038             | 0.024 | 0.117 | -0.079 | 0.091 | 0.384 | -0.006                 | 0.026 | 0.828 |
| DHA-associated allele (rs2236212) | n-3 PUFA        | -0.044            | 0.041 | 0.278 | -0.092 | 0.067 | 0.174 | -0.004                 | 0.046 | 0.928 |
|                                   | DHA             | -0.041            | 0.043 | 0.345 | -0.080 | 0.075 | 0.285 | 0.0005                 | 0.044 | 0.991 |
|                                   | non-DHA PUFA    | -0.042            | 0.040 | 0.287 | -0.075 | 0.070 | 0.284 | -0.006                 | 0.044 | 0.886 |
| LA-associated alleles             | n-6 PUFA        | -0.045            | 0.027 | 0.104 | -0.099 | 0.092 | 0.285 | -0.037                 | 0.022 | 0.086 |
|                                   | LA              | -0.040            | 0.028 | 0.145 | -0.134 | 0.095 | 0.160 | -0.040                 | 0.023 | 0.078 |
|                                   | non-LA n-6 PUFA | -0.019            | 0.024 | 0.440 | 0.049  | 0.089 | 0.581 | -0.010                 | 0.024 | 0.686 |
| AA-associated alleles             | n-6 PUFA        | 0.005             | 0.035 | 0.895 | -0.242 | 0.088 | 0.006 | 0.007                  | 0.027 | 0.806 |
|                                   | LA              | -0.013            | 0.036 | 0.713 | -0.253 | 0.093 | 0.006 | -0.006                 | 0.028 | 0.825 |
|                                   | non-LA n-6 PUFA | -0.004            | 0.032 | 0.893 | -0.060 | 0.091 | 0.510 | 0.030                  | 0.029 | 0.300 |

Abbreviations: FAs fatty acids, MUFA monounsaturated fatty acid, PUFA polyunsaturated fatty acid, SFA saturated fatty acid, NAFLD non-

alcoholic fatty liver disease, *DHA* docosahexaenoic acid, *LA* linoleic acid, *SNP* single nucleotide polymorphism.

$\beta$ -Coefficients were adjusted for age, sex, race, BMI, education, household income, smoking status, alcohol consumption, physical activity, history of hypertension, CVD, high cholesterol and cancer, diabetes, aspirin use, vitamin use, mineral use, remain circulating fatty acids.

**Supplemental Table 7.** Interactions between plasma FAs and individual FA-associated SNPs for NAFLD risk

| □          | □                 | SNP    |       |          | FAs    |       |          | SNP*FAs |       |          |
|------------|-------------------|--------|-------|----------|--------|-------|----------|---------|-------|----------|
|            |                   | β      | SE    | <i>p</i> | β      | SE    | <i>p</i> | β       | SE    | <i>p</i> |
| rs2391388  | SFAs              | 0.035  | 0.042 | 0.412    | 0.216  | 0.048 | <0.001   | -0.026  | 0.035 | 0.463    |
| rs6675668  | SFAs              | -0.015 | 0.042 | 0.724    | 0.181  | 0.050 | <0.001   | 0.011   | 0.035 | 0.750    |
| rs11119805 | SFAs              | 0.053  | 0.065 | 0.412    | 0.336  | 0.096 | 0.001    | -0.082  | 0.052 | 0.110    |
| rs102275   | SFAs              | 0.025  | 0.045 | 0.578    | 0.248  | 0.057 | <0.001   | -0.045  | 0.036 | 0.217    |
| rs780093   | MUFAs             | 0.014  | 0.047 | 0.769    | 0.182  | 0.059 | 0.002    | 0.004   | 0.038 | 0.914    |
| rs6722456  | MUFAs             | 0.375  | 0.187 | 0.045    | 0.513  | 0.272 | 0.059    | -0.166  | 0.137 | 0.225    |
| rs603424   | MUFAs             | -0.016 | 0.059 | 0.787    | 0.135  | 0.095 | 0.156    | 0.031   | 0.049 | 0.530    |
| rs11190604 | MUFAs             | 0.071  | 0.055 | 0.191    | 0.202  | 0.052 | <0.001   | -0.036  | 0.044 | 0.410    |
| rs102275   | MUFAs             | -0.040 | 0.050 | 0.424    | 0.163  | 0.058 | 0.005    | 0.032   | 0.038 | 0.406    |
| rs174547   | n-3 PUFAs         | -0.039 | 0.046 | 0.394    | -0.117 | 0.056 | 0.036    | 0.014   | 0.047 | 0.763    |
|            | DHA               | -0.038 | 0.050 | 0.440    | -0.063 | 0.065 | 0.333    | -0.023  | 0.046 | 0.622    |
|            | non-DHA n-3 PUFAs | -0.030 | 0.045 | 0.510    | -0.121 | 0.061 | 0.046    | 0.041   | 0.046 | 0.374    |
| rs3798713  | n-3 PUFAs         | 0.035  | 0.041 | 0.390    | -0.091 | 0.059 | 0.121    | -0.006  | 0.046 | 0.892    |
|            | DHA               | 0.029  | 0.043 | 0.497    | -0.071 | 0.067 | 0.291    | -0.011  | 0.044 | 0.807    |
|            | non-DHA n-3 PUFAs | 0.035  | 0.040 | 0.382    | -0.082 | 0.062 | 0.190    | -0.001  | 0.044 | 0.982    |
| rs174538   | n-3 PUFAs         | 0.037  | 0.047 | 0.435    | -0.096 | 0.080 | 0.229    | -0.007  | 0.048 | 0.889    |
|            | DHA               | 0.045  | 0.051 | 0.374    | -0.138 | 0.083 | 0.098    | 0.043   | 0.047 | 0.356    |
|            | non-DHA n-3 PUFAs | 0.024  | 0.046 | 0.598    | -0.030 | 0.082 | 0.710    | -0.044  | 0.047 | 0.351    |
| rs780094   | n-3 PUFAs         | 0.029  | 0.041 | 0.483    | -0.112 | 0.057 | 0.050    | 0.018   | 0.046 | 0.692    |
|            | DHA               | 0.034  | 0.044 | 0.444    | -0.095 | 0.067 | 0.152    | 0.017   | 0.045 | 0.708    |
|            | non-DHA n-3 PUFAs | 0.028  | 0.041 | 0.496    | -0.095 | 0.061 | 0.122    | 0.015   | 0.044 | 0.734    |
| rs3734398  | n-3 PUFAs         | 0.051  | 0.041 | 0.205    | -0.098 | 0.059 | 0.095    | 0.002   | 0.046 | 0.959    |

|            |                   |        |       |       |        |       |        |        |       |       |
|------------|-------------------|--------|-------|-------|--------|-------|--------|--------|-------|-------|
|            | DHA               | 0.047  | 0.043 | 0.278 | -0.075 | 0.067 | 0.264  | -0.005 | 0.044 | 0.908 |
|            | non-DHA n-3 PUFAs | 0.050  | 0.040 | 0.208 | -0.089 | 0.062 | 0.155  | 0.007  | 0.044 | 0.874 |
| rs174547   | n-3 PUFAs         | 0.039  | 0.046 | 0.394 | -0.089 | 0.076 | 0.242  | -0.014 | 0.047 | 0.763 |
|            | DHA               | 0.038  | 0.050 | 0.440 | -0.109 | 0.080 | 0.174  | 0.023  | 0.046 | 0.622 |
|            | non-DHA n-3 PUFAs | 0.030  | 0.045 | 0.510 | -0.040 | 0.078 | 0.611  | -0.041 | 0.046 | 0.374 |
|            | n-3 PUFAs         | -0.044 | 0.041 | 0.278 | -0.092 | 0.067 | 0.174  | -0.004 | 0.046 | 0.928 |
| rs2236212  | DHA               | -0.041 | 0.043 | 0.345 | -0.080 | 0.075 | 0.285  | 0.0005 | 0.044 | 0.991 |
|            | non-DHA n-3 PUFAs | -0.042 | 0.040 | 0.287 | -0.075 | 0.070 | 0.284  | -0.006 | 0.044 | 0.886 |
|            | n-6 PUFAs         | 0.001  | 0.046 | 0.978 | -0.202 | 0.070 | 0.004  | -0.019 | 0.036 | 0.599 |
| rs10740118 | LA                | -0.012 | 0.046 | 0.796 | -0.216 | 0.073 | 0.003  | -0.044 | 0.038 | 0.254 |
|            | non-LA n-6 PUFAs  | 0.018  | 0.040 | 0.648 | -0.023 | 0.065 | 0.725  | 0.037  | 0.040 | 0.357 |
|            | PUFAs             | -0.065 | 0.050 | 0.193 | -0.218 | 0.066 | 0.001  | -0.048 | 0.037 | 0.199 |
| rs174547   | n-6 PUFAs         | -0.077 | 0.050 | 0.123 | -0.184 | 0.062 | 0.003  | -0.051 | 0.037 | 0.167 |
|            | LA                | -0.046 | 0.050 | 0.362 | -0.245 | 0.064 | <0.001 | -0.030 | 0.039 | 0.438 |
|            | non-LA n-6 PUFAs  | -0.044 | 0.046 | 0.341 | 0.061  | 0.053 | 0.253  | -0.066 | 0.041 | 0.109 |
|            | n-6 PUFAs         | -0.067 | 0.049 | 0.169 | -0.167 | 0.077 | 0.029  | -0.041 | 0.039 | 0.283 |
| rs16966952 | LA                | -0.071 | 0.049 | 0.149 | -0.206 | 0.080 | 0.010  | -0.046 | 0.041 | 0.259 |
|            | non-LA n-6 PUFAs  | -0.044 | 0.043 | 0.304 | 0.027  | 0.073 | 0.715  | -0.004 | 0.042 | 0.928 |

*Abbreviations: FA* fatty acid, *MUFA* monounsaturated fatty acid, *PUFA* polyunsaturated fatty acid, *SFA* saturated fatty acid, *NAFLD* non-alcoholic fatty liver disease, *DHA* docosahexaenoic acid, *LA* linoleic acid, *SNP* single nucleotide polymorphism.

$\beta$ -Coefficients were adjusted for age, sex, race, BMI, education, household income, smoking status, alcohol consumption, physical activity, history of hypertension, CVD, high cholesterol and cancer, diabetes, aspirin use, vitamin use, mineral use, remain circulating fatty acids.

**Supplemental Table 8.** The subgroup analysis of plasma FAs and NAFLD risk

| □                      | <b>Sex</b>                         |                |                                 |                | □     |
|------------------------|------------------------------------|----------------|---------------------------------|----------------|-------|
|                        | <b>Women (cases/N: 739/63309)</b>  |                | <b>Men (cases/N: 655/52914)</b> |                |       |
| □                      | HR (95% CI)                        | <i>p</i> value | HR (95% CI)                     | <i>p</i> value |       |
| Plasma SFAs            | 1.92(1.37-2.71)                    | <0.001         | 1.82(1.28-2.60)                 | <0.001         | 0.284 |
| Plasma MUFAs           | 1.88(1.19-2.97)                    | 0.007          | 1.57(0.94-2.63)                 | 0.087          | 0.084 |
| Plasma PUFAs           | 0.89(0.58-1.38)                    | 0.609          | 0.67(0.43-1.06)                 | 0.086          | 0.029 |
| Plasma n-3 PUFAs       | 0.73(0.56-0.96)                    | 0.025          | 0.85(0.64-1.13)                 | 0.266          | 0.284 |
| Plasma DHA             | 0.90(0.63-1.28)                    | 0.554          | 0.94(0.64-1.38)                 | 0.736          | 0.110 |
| Plasma other n-3 PUFAs | 0.84(0.61-1.15)                    | 0.282          | 0.97(0.71-1.34)                 | 0.870          | 0.752 |
| Plasma n-6 PUFAs       | 0.63(0.39-1.00)                    | 0.050          | 0.70(0.42-1.16)                 | 0.166          | 0.120 |
| Plasma LA              | 0.60(0.39-0.91)                    | 0.017          | 0.93(0.60-1.45)                 | 0.759          | 0.033 |
| Plasma other n-6 PUFAs | 1.09(0.80-1.47)                    | 0.292          | 1.04(0.77-1.42)                 | 0.796          | 0.907 |
| □                      | <b>Baseline age (years)</b>        |                |                                 |                | □     |
| □                      | <b>&lt;60 (cases/N: 783/65920)</b> |                | <b>≥60 (cases/N: 611/50303)</b> |                |       |
| □                      | HR (95% CI)                        | <i>p</i> value | HR (95% CI)                     | <i>p</i> value |       |
| Plasma SFAs            | 1.63(1.19-2.24)                    | 0.002          | 2.20(1.50-3.24)                 | <0.001         | 0.116 |
| Plasma MUFAs           | 1.34(0.86-2.11)                    | 0.198          | 2.37(1.40-4.00)                 | 0.001          | 0.086 |
| Plasma PUFAs           | 0.58(0.38-0.89)                    | 0.012          | 0.98(0.62-1.56)                 | 0.945          | 0.964 |
| Plasma n-3 PUFAs       | 0.90(0.69-1.18)                    | 0.435          | 0.69(0.52-0.92)                 | 0.011          | 0.029 |
| Plasma DHA             | 0.93(0.64-1.34)                    | 0.679          | 0.88(0.60-1.29)                 | 0.507          | 0.100 |
| Plasma other n-3 PUFAs | 0.97(0.72-1.31)                    | 0.853          | 0.84(0.59-1.17)                 | 0.300          | 0.021 |
| Plasma n-6 PUFAs       | 0.61(0.39-0.97)                    | 0.036          | 0.81(0.48-1.35)                 | 0.410          | 0.649 |
| Plasma LA              | 0.66(0.44-1.00)                    | 0.048          | 0.88(0.55-1.40)                 | 0.591          | 0.302 |
| Plasma other n-6 PUFAs | 0.96(0.72-1.29)                    | 0.799          | 1.25(0.91-1.73)                 | 0.172          | 0.565 |
| □                      | <b>Baseline BMI</b>                |                |                                 |                | □     |



|                        | <b>&lt;30 (cases/N: 643/87588)</b>                       |                | <b>≥30 (cases/N: 744/28223)</b>              |                | <i>P</i> for interaction |
|------------------------|----------------------------------------------------------|----------------|----------------------------------------------|----------------|--------------------------|
| □                      | HR (95% CI)                                              | <i>p</i> value | HR (95% CI)                                  | <i>p</i> value |                          |
| Plasma SFAs            | 1.87(1.31-2.68)                                          | <0.001         | 1.87(1.33-2.63)                              | <0.001         | 0.067                    |
| Plasma MUFAs           | 1.75(1.10-2.78)                                          | 0.019          | 1.62(0.96-2.72)                              | 0.070          | 0.004                    |
| Plasma PUFAs           | 0.82(0.52-1.29)                                          | 0.380          | 0.78(0.50-1.22)                              | 0.279          | 0.001                    |
| Plasma n-3 PUFAs       | 0.83(0.62-1.11)                                          | 0.211          | 0.77(0.59-1.01)                              | 0.056          | 0.228                    |
| Plasma DHA             | 0.97(0.66-1.42)                                          | 0.873          | 0.88(0.61-1.27)                              | 0.480          | 0.795                    |
| Plasma other n-3 PUFAs | 1.06(0.76-1.48)                                          | 0.737          | 0.82(0.61-1.11)                              | 0.203          | 0.080                    |
| Plasma n-6 PUFAs       | 0.64(0.39-1.04)                                          | 0.071          | 0.73(0.45-1.19)                              | 0.208          | 0.001                    |
| Plasma LA              | 0.91(0.59-1.41)                                          | 0.675          | 0.62(0.40-0.97)                              | 0.034          | 0.013                    |
| Plasma other n-6 PUFAs | 1.10(0.80-1.51)                                          | 0.578          | 1.05(0.78-1.41)                              | 0.751          | 0.456                    |
| □                      | <b>Smoking status</b>                                    |                |                                              |                | □                        |
|                        | <b>Never (cases/N: 649/63521)</b>                        |                | <b>Previous/current (cases/N: 736/52108)</b> |                | <i>P</i> for interaction |
| □                      | HR (95% CI)                                              | <i>p</i> value | HR (95% CI)                                  | <i>p</i> value |                          |
| Plasma SFAs            | 1.75(1.23-2.49)                                          | 0.002          | 1.97(1.40-2.77)                              | <0.001         | 0.892                    |
| Plasma MUFAs           | 1.55(0.95-2.51)                                          | 0.079          | 1.92(1.19-3.12)                              | 0.008          | 0.915                    |
| Plasma PUFAs           | 0.82(0.51-1.32)                                          | 0.410          | 0.73(0.47-1.11)                              | 0.139          | 0.678                    |
| Plasma n-3 PUFAs       | 0.84(0.63-1.11)                                          | 0.220          | 0.78(0.59-1.02)                              | 0.069          | 0.659                    |
| Plasma DHA             | 1.12(0.77-1.64)                                          | 0.557          | 0.80(0.55-1.15)                              | 0.218          | 0.368                    |
| Plasma other n-3 PUFAs | 0.77(0.56-1.08)                                          | 0.126          | 1.03(0.76-1.40)                              | 0.845          | 0.914                    |
| Plasma n-6 PUFAs       | 0.91 (0.77-1.07)                                         | 0.245          | 0.74(0.45-1.22)                              | 0.236          | 0.794                    |
| Plasma LA              | 0.73(0.47-1.13)                                          | 0.158          | 0.70(0.45-1.09)                              | 0.113          | 0.787                    |
| Plasma other n-6 PUFAs | 0.91(0.66-1.25)                                          | 0.562          | 1.21(0.91-1.62)                              | 0.198          | 0.680                    |
| □                      | <b>Alcohol consumption</b>                               |                |                                              |                | □                        |
|                        | <b>Never/special occasions only (cases/N: 410/22405)</b> |                | <b>≥1 time/month (cases/N: 979/93591)</b>    |                | <i>P</i> for interaction |

| <input type="checkbox"/> | HR (95% CI)                              | <i>p</i> value | HR (95% CI)                              | <i>p</i> value |                          |
|--------------------------|------------------------------------------|----------------|------------------------------------------|----------------|--------------------------|
| Plasma SFAs              | 2.44 (1.57-3.80)                         | <0.001         | 1.60 (1.19-2.15)                         | 0.002          | 0.794                    |
| Plasma MUFAs             | 2.09 (1.10-3.97)                         | 0.024          | 1.52 (1.01-2.28)                         | 0.043          | 0.179                    |
| Plasma PUFAs             | 0.83 (0.47-1.47)                         | 0.513          | 0.68 (0.47-0.99)                         | 0.042          | 0.119                    |
| Plasma n-3 PUFAs         | 0.90 (0.63-1.29)                         | 0.558          | 0.75 (0.59-0.94)                         | 0.014          | 0.590                    |
| Plasma DHA               | 1.00 (0.62-1.61)                         | 0.991          | 0.88 (0.64-1.21)                         | 0.434          | 0.396                    |
| Plasma other n-3 PUFAs   | 1.08 (0.71-1.66)                         | 0.709          | 0.84 (0.65-1.10)                         | 0.205          | 0.614                    |
| Plasma n-6 PUFAs         | 0.66 (0.36-1.22)                         | 0.186          | 0.66 (0.44-1.01)                         | 0.054          | 0.462                    |
| Plasma LA                | 0.94 (0.54-1.62)                         | 0.813          | 0.63 (0.43-0.92)                         | 0.016          | 0.339                    |
| Plasma other n-6 PUFAs   | 1.08 (0.73-1.61)                         | 0.688          | 1.07 (0.83-1.38)                         | 0.615          | 0.841                    |
| <input type="checkbox"/> | <b>Physical activity (MET-h/week)</b>    |                |                                          |                | <input type="checkbox"/> |
|                          | <b>Below median (cases/N: 614/46898)</b> |                | <b>Above median (cases/N: 452/47044)</b> |                | <i>P</i> for interaction |
| <input type="checkbox"/> | HR (95% CI)                              | <i>p</i> value | HR (95% CI)                              | <i>p</i> value |                          |
| Plasma SFAs              | 2.03 (1.41-2.94)                         | <0.001         | 1.60 (1.04-2.45)                         | 0.032          | 0.948                    |
| Plasma MUFAs             | 1.78 (1.05-3.00)                         | 0.037          | 1.60 (0.89-2.87)                         | 0.116          | 0.682                    |
| Plasma PUFAs             | 0.76 (0.47-1.22)                         | 0.254          | 0.94 (0.54-1.63)                         | 0.830          | 0.560                    |
| Plasma n-3 PUFAs         | 0.74 (0.55-0.98)                         | 0.039          | 0.82 (0.59-1.15)                         | 0.254          | 0.752                    |
| Plasma DHA               | 0.98 (0.67-1.44)                         | 0.907          | 0.81 (0.51-1.30)                         | 0.386          | 0.581                    |
| Plasma other n-3 PUFAs   | 0.82 (0.59-1.15)                         | 0.248          | 0.94 (0.65-1.37)                         | 0.754          | 0.944                    |
| Plasma n-6 PUFAs         | 0.69 (0.41-1.16)                         | 0.163          | 0.60 (0.33-1.09)                         | 0.095          | 0.821                    |
| Plasma LA                | 0.78 (0.49-1.23)                         | 0.289          | 0.58 (0.34-1.00)                         | 0.048          | 0.706                    |
| Plasma other n-6 PUFAs   | 1.17 (0.85-1.61)                         | 0.350          | 0.75 (0.51-1.10)                         | 0.135          | 0.200                    |
| <input type="checkbox"/> | <b>History of diabetes</b>               |                |                                          |                | <input type="checkbox"/> |
|                          | <b>No (cases/N: 1150/109828)</b>         |                | <b>Yes (cases/N: 244/6395)</b>           |                | <i>P</i> for interaction |
| <input type="checkbox"/> | HR (95% CI)                              | <i>p</i> value | HR (95% CI)                              | <i>p</i> value |                          |
| Plasma SFAs              | 1.71 (1.31-2.25)                         | <0.001         | 2.64 (1.49-4.70)                         | <0.001         | 0.654                    |

|                          |                                          |         |                                          |         |                          |
|--------------------------|------------------------------------------|---------|------------------------------------------|---------|--------------------------|
| Plasma MUFAs             | 1.97 (1.35-2.86)                         | 0.002   | 0.67 (0.29-1.54)                         | 0.342   | <0.001                   |
| Plasma PUFAs             | 0.78 (0.55-1.09)                         | 0.145   | 0.64 (0.29-1.39)                         | 0.259   | 0.005                    |
| Plasma n-3 PUFAs         | 0.87 (0.70-1.08)                         | 0.204   | 0.50 (0.31-0.81)                         | 0.004   | 0.259                    |
| Plasma DHA               | 0.90 (0.67-1.21)                         | 0.475   | 0.96 (0.53-1.74)                         | 0.881   | 0.634                    |
| Plasma other n-3 PUFAs   | 0.97 (0.76-1.24)                         | 0.798   | 0.70 (0.41-1.21)                         | 0.202   | 0.189                    |
| Plasma n-6 PUFAs         | 0.71 (0.49-1.03)                         | 0.072   | 0.49 (0.21-1.13)                         | 0.095   | 0.020                    |
| Plasma LA                | 0.74 (0.53-1.04)                         | 0.080   | 0.85 (0.37-1.93)                         | 0.692   | 0.011                    |
| Plasma other n-6 PUFAs   | 1.17 (0.92-1.50)                         | 0.194   | 0.84 (0.51-1.38)                         | 0.489   | 0.731                    |
| <input type="checkbox"/> | <b>History of hypertension</b>           |         |                                          |         | <input type="checkbox"/> |
|                          | <b>No (cases/N: 365/49887)</b>           |         | <b>Yes (cases/N: 1029/66336)</b>         |         | <i>P</i> for interaction |
| <input type="checkbox"/> | HR (95% CI)                              | p value | HR (95% CI)                              | p value | <input type="checkbox"/> |
| Plasma SFAs              | 1.95 (1.23-3.09)                         | 0.0044  | 1.86 (1.39-2.49)                         | <0.001  | 0.323                    |
| Plasma MUFAs             | 1.50 (0.80-2.81)                         | 0.2032  | 1.91 (1.27-2.88)                         | 0.002   | 0.545                    |
| Plasma PUFAs             | 0.74 (0.39-1.40)                         | 0.3586  | 0.74 (0.52-1.07)                         | 0.111   | 0.214                    |
| Plasma n-3 PUFAs         | 0.74 (0.50-1.10)                         | 0.1362  | 0.82 (0.66-1.03)                         | 0.088   | 0.763                    |
| Plasma DHA               | 1.00 (0.59-1.68)                         | 0.9862  | 0.91 (0.67-1.23)                         | 0.535   | 0.934                    |
| Plasma other n-3 PUFAs   | 0.90 (0.58-1.39)                         | 0.6228  | 0.90 (0.70-1.17)                         | 0.430   | 0.615                    |
| Plasma n-6 PUFAs         | 0.37 (0.19-0.70)                         | 0.0025  | 0.90 (0.60-1.36)                         | 0.626   | 0.065                    |
| Plasma LA                | 0.52 (0.29-0.94)                         | 0.0303  | 0.88 (0.61-1.26)                         | 0.479   | 0.015                    |
| Plasma other n-6 PUFAs   | 1.28 (0.84-1.96)                         | 0.2454  | 1.02 (0.79-1.31)                         | 0.897   | 0.116                    |
| <input type="checkbox"/> | <b>Household income</b>                  |         |                                          |         | <input type="checkbox"/> |
|                          | <b>Below median (cases/N: 705/47827)</b> |         | <b>Above median (cases/N: 689/68396)</b> |         | <i>P</i> for interaction |
| <input type="checkbox"/> | HR (95% CI)                              | p value | HR (95% CI)                              | p value | <input type="checkbox"/> |
| Plasma SFAs              | 1.66 (1.18-2.33)                         | 0.003   | 2.06 (1.45-2.93)                         | <0.001  | 0.372                    |
| Plasma MUFAs             | 2.17 (1.30-3.60)                         | 0.003   | 1.51 (0.95-2.42)                         | 0.082   | 0.220                    |
| Plasma PUFAs             | 0.53 (0.34-0.84)                         | 0.006   | 0.96 (0.62-1.49)                         | 0.849   | 0.640                    |

|                        |                  |        |                  |       |       |
|------------------------|------------------|--------|------------------|-------|-------|
| Plasma n-3 PUFAs       | 0.62 (0.47-0.81) | <0.001 | 1.04 (0.79-1.38) | 0.774 | 0.044 |
| Plasma DHA             | 0.91 (0.63-1.31) | 0.603  | 0.93 (0.64-1.35) | 0.687 | 0.203 |
| Plasma other n-3 PUFAs | 0.81 (0.59-1.11) | 0.193  | 1.01 (0.74-1.39) | 0.945 | 0.095 |
| Plasma n-6 PUFAs       | 0.49 (0.30-0.79) | 0.003  | 0.96 (0.59-1.56) | 0.854 | 0.452 |
| Plasma LA              | 0.69 (0.45-1.06) | 0.093  | 0.77 (0.50-1.19) | 0.232 | 0.983 |
| Plasma other n-6 PUFAs | 1.19 (0.88-1.60) | 0.256  | 0.95 (0.70-1.29) | 0.732 | 0.673 |

---

*Abbreviations:* *FAs* fatty acids, *MUFA* monounsaturated fatty acid, *PUFA* polyunsaturated fatty acid, *SFA* saturated fatty acid, *NAFLD* non-alcoholic fatty liver disease, *DHA* docosahexaenoic acid, *LA* linoleic acid, *BMI* body mass index, *MET* metabolic equivalent of task.

**Supplemental Table 9.** The sensitivity analysis of plasma FAs and NAFLD risk

| □                                                      | Quartiles of plasma fatty acids (% of total fatty acids) |                  |                  |                  | □      |
|--------------------------------------------------------|----------------------------------------------------------|------------------|------------------|------------------|--------|
|                                                        | Q1                                                       | Q2               | Q3               | Q4               |        |
| <b>Further adjusted for lipid-lowering medications</b> |                                                          |                  |                  |                  |        |
| Plasma SFA                                             | 1.00                                                     | 1.36 (1.11-1.66) | 1.48 (1.19-1.85) | 1.85 (1.45-2.36) | <0.001 |
| Plasma MUFA                                            | 1.00                                                     | 1.43 (1.11-1.84) | 1.63 (1.22-2.19) | 1.73 (1.23-2.44) | 0.007  |
| Plasma PUFA                                            | 1.00                                                     | 1.00 (0.83-1.19) | 0.84 (0.66-1.06) | 0.72 (0.53-0.99) | 0.018  |
| Plasma n-3 PUFA                                        | 1.00                                                     | 0.92 (0.79-1.06) | 0.87 (0.75-1.02) | 0.79 (0.65-0.96) | 0.017  |
| Plasma DHA                                             | 1.00                                                     | 0.98 (0.84-1.14) | 0.87 (0.71-1.05) | 0.92 (0.71-1.19) | 0.279  |
| Plasma non-DHA n-3 PUFA                                | 1.00                                                     | 0.95 (0.81-1.12) | 0.89 (0.75-1.07) | 0.90 (0.72-1.12) | 0.275  |
| Plasma n-6 PUFA                                        | 1.00                                                     | 0.87 (0.73-1.04) | 0.75 (0.58-0.97) | 0.68 (0.48-0.95) | 0.017  |
| Plasma LA                                              | 1.00                                                     | 0.88 (0.75-1.03) | 0.77 (0.62-0.97) | 0.73 (0.54-1.00) | 0.024  |
| Plasma non-LA n-6 PUFA                                 | 1.00                                                     | 1.00 (0.86-1.17) | 0.99 (0.83-1.17) | 1.05 (0.85-1.31) | 0.767  |
| <b>Further adjusted for healthy diet score</b>         |                                                          |                  |                  |                  |        |
| Plasma SFA                                             | 1.00                                                     | 1.36 (1.11-1.66) | 1.48 (1.18-1.84) | 1.83 (1.44-2.34) | <0.001 |
| Plasma MUFA                                            | 1.00                                                     | 1.43 (1.11-1.83) | 1.63 (1.22-2.18) | 1.73 (1.23-2.43) | 0.007  |
| Plasma PUFA                                            | 1.00                                                     | 1.00 (0.83-1.19) | 0.84 (0.66-1.07) | 0.73 (0.53-1.00) | 0.021  |
| Plasma n-3 PUFA                                        | 1.00                                                     | 0.93 (0.80-1.07) | 0.89 (0.76-1.04) | 0.81 (0.66-0.98) | 0.032  |
| Plasma DHA                                             | 1.00                                                     | 0.98 (0.84-1.14) | 0.87 (0.72-1.06) | 0.92 (0.71-1.20) | 0.307  |
| Plasma non-DHA n-3 PUFA                                | 1.00                                                     | 0.96 (0.81-1.12) | 0.90 (0.75-1.08) | 0.91 (0.73-1.14) | 0.330  |
| Plasma n-6 PUFA                                        | 1.00                                                     | 0.87 (0.73-1.04) | 0.75 (0.58-0.97) | 0.68 (0.48-0.96) | 0.018  |
| Plasma LA                                              | 1.00                                                     | 0.87 (0.74-1.02) | 0.77 (0.61-0.96) | 0.73 (0.54-0.99) | 0.022  |
| Plasma non-LA n-6 PUFA                                 | 1.00                                                     | 1.01 (0.87-1.17) | 1.00 (0.84-1.18) | 1.07 (0.86-1.33) | 0.649  |
| <b>Excluding the initial 2 years of follow-up</b>      |                                                          |                  |                  |                  |        |
| Plasma SFA                                             | 1.00                                                     | 1.31 (1.06-1.63) | 1.43 (1.13-1.81) | 1.67 (1.29-2.18) | <0.001 |
| Plasma MUFA                                            | 1.00                                                     | 1.43 (1.10-1.87) | 1.45 (1.06-1.98) | 1.62 (1.12-2.34) | 0.034  |

|                                     |      |                  |                  |                  |        |
|-------------------------------------|------|------------------|------------------|------------------|--------|
| Plasma PUFA                         | 1.00 | 0.98 (0.82-1.18) | 0.83 (0.65-1.06) | 0.73 (0.53-1.00) | 0.023  |
| Plasma n-3 PUFA                     | 1.00 | 0.92 (0.78-1.08) | 0.89 (0.75-1.06) | 0.80 (0.65-0.99) | 0.045  |
| Plasma DHA                          | 1.00 | 0.94 (0.79-1.10) | 0.90 (0.73-1.11) | 0.93 (0.70-1.23) | 0.436  |
| Plasma non-DHA n-3 PUFA             | 1.00 | 0.97 (0.82-1.15) | 0.88 (0.72-1.06) | 0.85 (0.67-1.09) | 0.127  |
| Plasma n-6 PUFA                     | 1.00 | 0.89 (0.73-1.08) | 0.77 (0.58-1.01) | 0.70 (0.49-1.02) | 0.046  |
| Plasma LA                           | 1.00 | 0.83 (0.70-0.99) | 0.74 (0.58-0.94) | 0.67 (0.48-0.93) | 0.010  |
| Plasma non-LA n-6 PUFA              | 1.00 | 1.01 (0.85-1.18) | 0.96 (0.80-1.16) | 1.03 (0.82-1.31) | 0.946  |
| <b>Further adjusted for hormone</b> |      |                  |                  |                  |        |
| Plasma SFA                          | 1.00 | 1.36 (1.11-1.66) | 1.48 (1.18-1.84) | 1.82 (1.42-2.32) | <0.001 |
| Plasma MUFA                         | 1.00 | 1.44 (1.12-1.84) | 1.65 (1.23-2.21) | 1.76 (1.25-2.47) | 0.006  |
| Plasma PUFA                         | 1.00 | 1.00 (0.83-1.19) | 0.84 (0.66-1.07) | 0.73 (0.53-0.99) | 0.020  |
| Plasma n-3 PUFA                     | 1.00 | 0.92 (0.79-1.06) | 0.87 (0.74-1.02) | 0.78 (0.64-0.95) | 0.013  |
| Plasma DHA                          | 1.00 | 0.97 (0.84-1.13) | 0.86 (0.71-1.04) | 0.91 (0.70-1.18) | 0.235  |
| Plasma non-DHA n-3 PUFA             | 1.00 | 0.96 (0.81-1.12) | 0.90 (0.75-1.07) | 0.90 (0.72-1.12) | 0.266  |
| Plasma n-6 PUFA                     | 1.00 | 0.87 (0.73-1.04) | 0.75 (0.58-0.97) | 0.68 (0.48-0.96) | 0.018  |
| Plasma LA                           | 1.00 | 0.87 (0.74-1.03) | 0.77 (0.61-0.96) | 0.73 (0.54-0.99) | 0.022  |
| Plasma non-LA n-6 PUFA              | 1.00 | 1.00 (0.86-1.17) | 0.99 (0.83-1.17) | 1.05 (0.85-1.31) | 0.767  |
| <b>Further adjusted for TDI</b>     |      |                  |                  |                  |        |
| Plasma SFA                          | 1.00 | 1.36 (1.11-1.66) | 1.48 (1.19-1.85) | 1.85 (1.45-2.36) | <0.001 |
| Plasma MUFA                         | 1.00 | 1.43 (1.11-1.83) | 1.63 (1.22-2.19) | 1.73 (1.23-2.43) | 0.007  |
| Plasma PUFA                         | 1.00 | 1.00 (0.83-1.19) | 0.84 (0.66-1.06) | 0.72 (0.53-0.99) | 0.018  |
| Plasma n-3 PUFA                     | 1.00 | 0.93 (0.80-1.07) | 0.89 (0.76-1.04) | 0.80 (0.66-0.98) | 0.029  |
| Plasma DHA                          | 1.00 | 0.98 (0.84-1.14) | 0.87 (0.72-1.06) | 0.92 (0.71-1.20) | 0.299  |
| Plasma non-DHA n-3 PUFA             | 1.00 | 0.95 (0.81-1.12) | 0.90 (0.75-1.08) | 0.91 (0.73-1.14) | 0.320  |
| Plasma n-6 PUFA                     | 1.00 | 0.87 (0.73-1.04) | 0.75 (0.58-0.97) | 0.68 (0.48-0.96) | 0.018  |
| Plasma LA                           | 1.00 | 0.87 (0.74-1.02) | 0.77 (0.61-0.96) | 0.73 (0.54-0.99) | 0.022  |

|                                                                      |      |                  |                  |                  |        |
|----------------------------------------------------------------------|------|------------------|------------------|------------------|--------|
| Plasma non-LA n-6 PUFA                                               | 1.00 | 1.01 (0.87-1.18) | 1.00 (0.84-1.19) | 1.07 (0.86-1.33) | 0.636  |
| <b>Excluding the adjustment for aspirin, vitamin and mineral use</b> |      |                  |                  |                  |        |
| Plasma SFA                                                           | 1.00 | 1.36 (1.11-1.66) | 1.48 (1.18-1.84) | 1.85 (1.45-2.36) | <0.001 |
| Plasma MUFA                                                          | 1.00 | 1.43 (1.11-1.83) | 1.63 (1.22-2.18) | 1.73 (1.23-2.44) | 0.007  |
| Plasma PUFA                                                          | 1.00 | 0.88 (0.73-1.07) | 0.79 (0.59-1.06) | 0.77 (0.52-1.16) | 0.024  |
| Plasma n-3 PUFA                                                      | 1.00 | 0.93 (0.80-1.07) | 0.89 (0.76-1.04) | 0.81 (0.67-0.99) | 0.037  |
| Plasma DHA                                                           | 1.00 | 0.98 (0.84-1.14) | 0.87 (0.72-1.06) | 0.93 (0.71-1.20) | 0.320  |
| Plasma non-DHA n-3 PUFA                                              | 1.00 | 0.96 (0.82-1.12) | 0.91 (0.76-1.08) | 0.92 (0.73-1.14) | 0.355  |
| Plasma n-6 PUFA                                                      | 1.00 | 0.87 (0.73-1.04) | 0.75 (0.58-0.97) | 0.68 (0.48-0.96) | 0.018  |
| Plasma LA                                                            | 1.00 | 0.87 (0.74-1.02) | 0.77 (0.61-0.96) | 0.73 (0.54-0.99) | 0.022  |
| Plasma non-LA n-6 PUFA                                               | 1.00 | 1.01 (0.87-1.18) | 1.00 (0.84-1.19) | 1.07 (0.87-1.33) | 0.624  |
| <b>Further adjusted for total energy intake</b>                      |      |                  |                  |                  |        |
| Plasma SFA                                                           | 1.00 | 1.36 (1.11-1.66) | 1.48 (1.19-1.85) | 1.84 (1.44-2.36) | <0.001 |
| Plasma MUFA                                                          | 1.00 | 1.43 (1.11-1.83) | 1.63 (1.22-2.19) | 1.73 (1.23-2.44) | 0.007  |
| Plasma PUFA                                                          | 1.00 | 0.88 (0.73-1.07) | 0.79 (0.59-1.06) | 0.77 (0.51-1.16) | 0.019  |
| Plasma n-3 PUFA                                                      | 1.00 | 0.92 (0.80-1.07) | 0.88 (0.75-1.03) | 0.80 (0.66-0.97) | 0.023  |
| Plasma DHA                                                           | 1.00 | 0.98 (0.84-1.14) | 0.87 (0.72-1.05) | 0.92 (0.71-1.19) | 0.283  |
| Plasma non-DHA n-3 PUFA                                              | 1.00 | 0.95 (0.81-1.12) | 0.90 (0.75-1.07) | 0.90 (0.72-1.13) | 0.297  |
| Plasma n-6 PUFA                                                      | 1.00 | 0.87 (0.73-1.04) | 0.75 (0.58-0.97) | 0.68 (0.48-0.96) | 0.018  |
| Plasma LA                                                            | 1.00 | 0.87 (0.74-1.02) | 0.77 (0.61-0.96) | 0.73 (0.54-0.99) | 0.022  |
| Plasma non-LA n-6 PUFA                                               | 1.00 | 1.01 (0.87-1.18) | 1.00 (0.84-1.19) | 1.08 (0.87-1.33) | 0.613  |

Abbreviations: *FAs* fatty acids, MUFA monounsaturated fatty acid, PUFA polyunsaturated fatty acid, SFA saturated fatty acid, NAFLD non-alcoholic fatty liver disease, DHA docosahexaenoic acid, LA linoleic acid, BMI body mass index, TDI Townsend deprivation index.
